# Supplementary material
Source: publisher figshare collection journal article supplement (https://acs.figshare.com/ndownloader/files/10711711)
Supplement: Supplementary file 1 [file 10711711]

# SUPPORTING INFORMATION

## **Super-Compressible Coaxial Carbon Nanotube@Graphene Arrays with Invariant Viscoelasticity over –100 to 500 °C in Ambient Air**

Lin Jing,<sup>1,2,¶</sup> Hongling Li,<sup>3,¶</sup> Jinjun Lin,<sup>3</sup> Roland Yingjie Tay,<sup>3</sup> Siu Hon Tsang,<sup>4</sup> Edwin Hang Tong Teo<sup>1,3\*</sup> and Alfred Iing Yoong Tok<sup>1,2\*</sup>

<sup>1</sup> School of Materials Science and Engineering, Nanyang Technological University, 50 Nanyang Avenue, Singapore 639798, Singapore

<sup>2</sup> Institute for Sports Research, Nanyang Technological University, 50 Nanyang Avenue, Singapore 639798, Singapore

<sup>3</sup> School of Electrical and Electronic Engineering, Nanyang Technological University, 50 Nanyang Avenue, Singapore 639798, Singapore

<sup>4</sup> Temasek Laboratories@NTU, 50 Nanyang Avenue, Singapore 639798, Singapore

¶ These two authors contribute equally to this work.

\* *Co-corresponding authors*. E-mail address: (E. H. T. T.) [HTTEO@ntu.edu.sg](mailto:HTTEO@ntu.edu.sg); (A. I. Y. T.) [MIYTOK@ntu.edu.sg](mailto:MIYTOK@ntu.edu.sg).

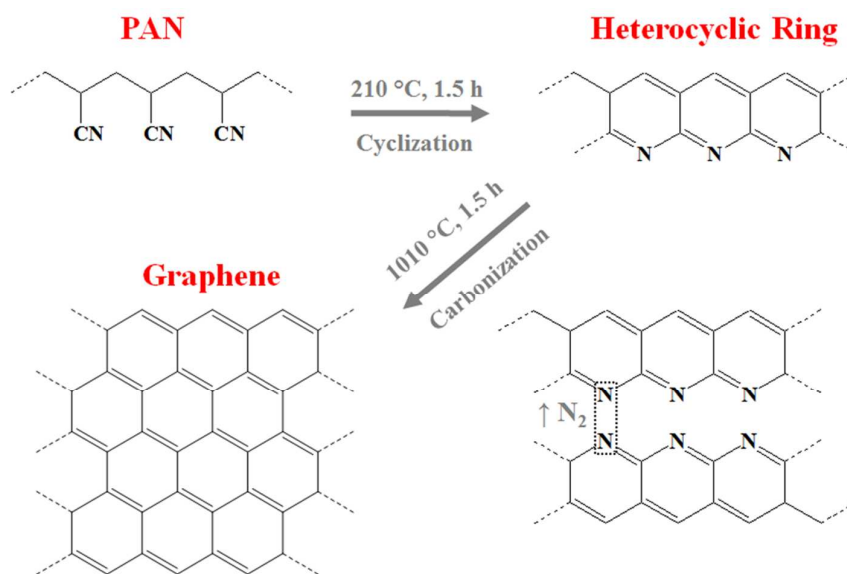

**Scheme S1** Schematic illustration of the synthesis of graphene layers by means of two-step pyrolysis processes.<sup>1</sup>

**Synthesis of CNT@Gr arrays.** Typically, the PAN coated CNT arrays were first heated up to 210 °C and kept at this temperature for 1.5 h in Ar atmosphere, during which the PAN layers can be converted into condensed heterocyclic ring structure (cyclization).<sup>1,2</sup> Then the resulting samples were further pyrolyzed at 1010 °C for 1.5 h to transform the heterocyclic ring structure into planar graphene layers by splitting off the heterocyclic nitrogen (carbonization).<sup>1,2</sup> Finally, the conformal graphene layers can be successfully introduced onto the CNTs to form the coaxial CNT@Gr arrays.

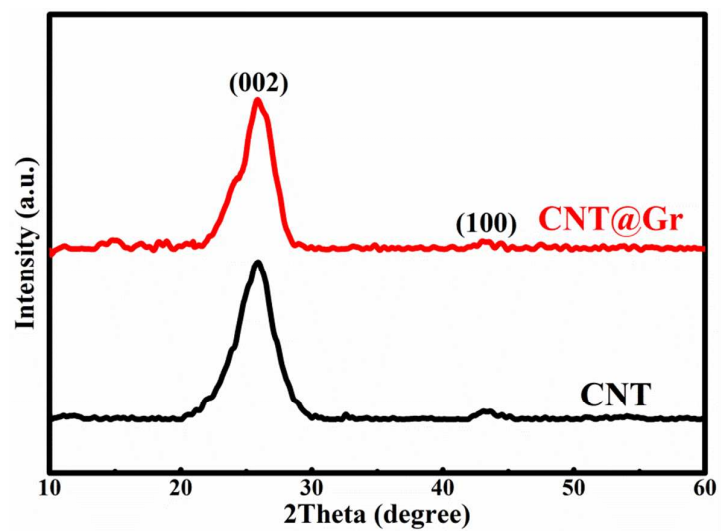

**Figure S1** XRD profiles of CNT and CNT@Gr. The characteristic (002) and (100) diffraction peaks indicate that the crystallinity is well preserved for the CNT@Gr.

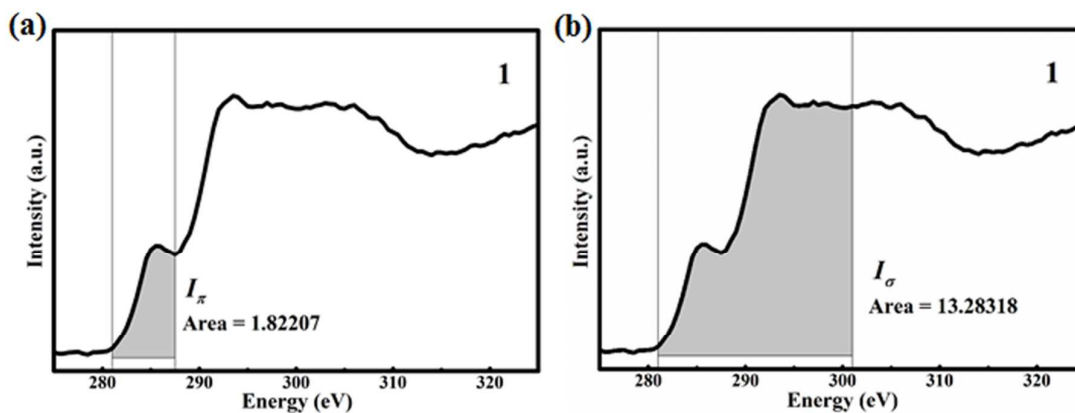

**Figure S2** 1s to  $\pi^*$  ( $I_\pi$ , shadow area in (a)) and total ( $I_\sigma$ , shadow area in (b)) peak intensities at the C K-edge for point 1.

**Calculation of  $sp^2 / sp^3$  ratio.** Take the EELS spectrum of point 1 as an example, the 1s to  $\pi^*$  peak intensity at the C K-edge (background was subtracted prior acquiring the spectrum) was measured using an energy window of 5 eV ( $I_\pi$ , as shown in Figure S2a).<sup>3</sup> The total C K-edge intensity was then measured in a window of up to 20 eV extending from the edge onset and covering the  $\pi^*$  peak and majority of the 1s to  $\sigma^*$  peak ( $I_\sigma$ , as shown in Figure S2b).<sup>3</sup> Next, the  $sp^2$  fraction  $x$  was calculated out according to  $3x / (4 - x) = (I_\pi / I_\sigma) / (I_\pi^R / I_\sigma^R)$ ,<sup>3,4</sup> where  $I_\pi^R$  and  $I_\sigma^R$  are the 1s to  $\pi^*$  and total peak intensities of the 100%  $sp^2$  carbon reference material, respectively. As a result, the  $sp^2$  fractions for **points 1, 2 and 3** were extracted to be 0.75, 0.76 and 0.73, corresponding to  **$sp^2 / sp^3$  ratios of 3, 3.17 and 2.70**, respectively.<sup>5</sup>

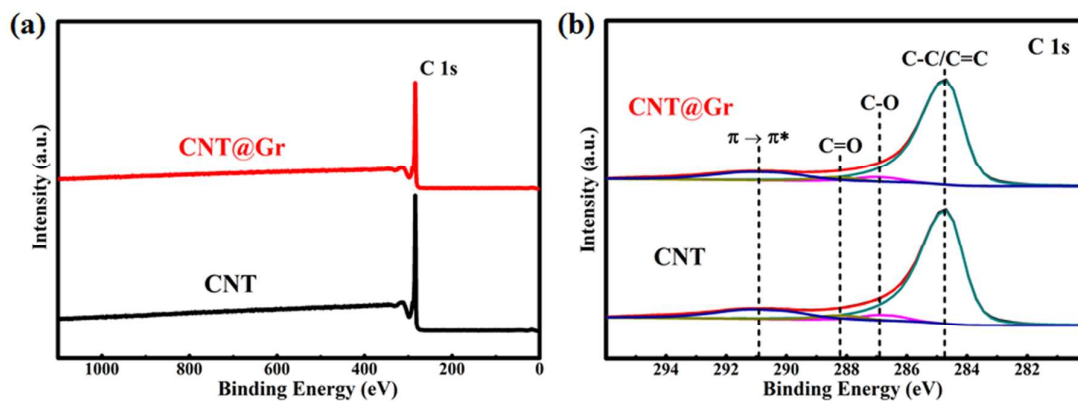

**Figure S3** XPS survey and high resolution C 1s spectra of CNT and CNT@Gr, respectively.

**XPS Analysis.** XPS survey spectra show that no other elements except carbon (graphitic C 1s peak at 284.68 eV)<sup>6</sup> can be detected for both the CNT and CNT@Gr. Meanwhile, high resolution C 1s spectrum of the CNT@Gr displays no noticeable shift or change in the peaks assigned to  $sp^2$  and  $sp^3$  hybridized states as compared to those of the initial CNT.<sup>7</sup>

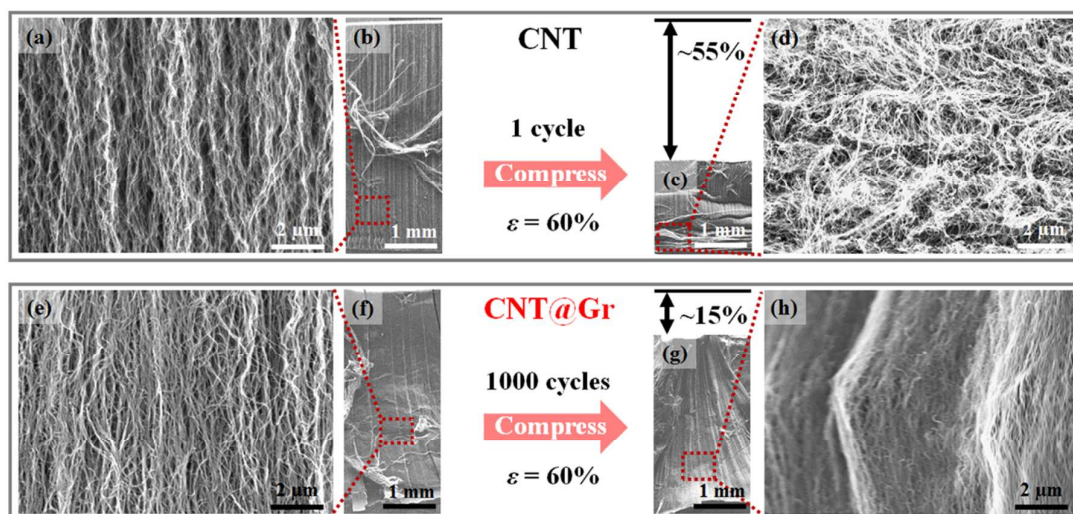

**Figure S4** Cross-sectional SEM images of CNT (a–d) and CNT@Gr (e–h) arrays before and after 1 and 1000 compression cycles at strain ( $\epsilon$ ) = 60%, respectively. (a, d, e, h) are the zoom-in views of (b, c, f, g), respectively.

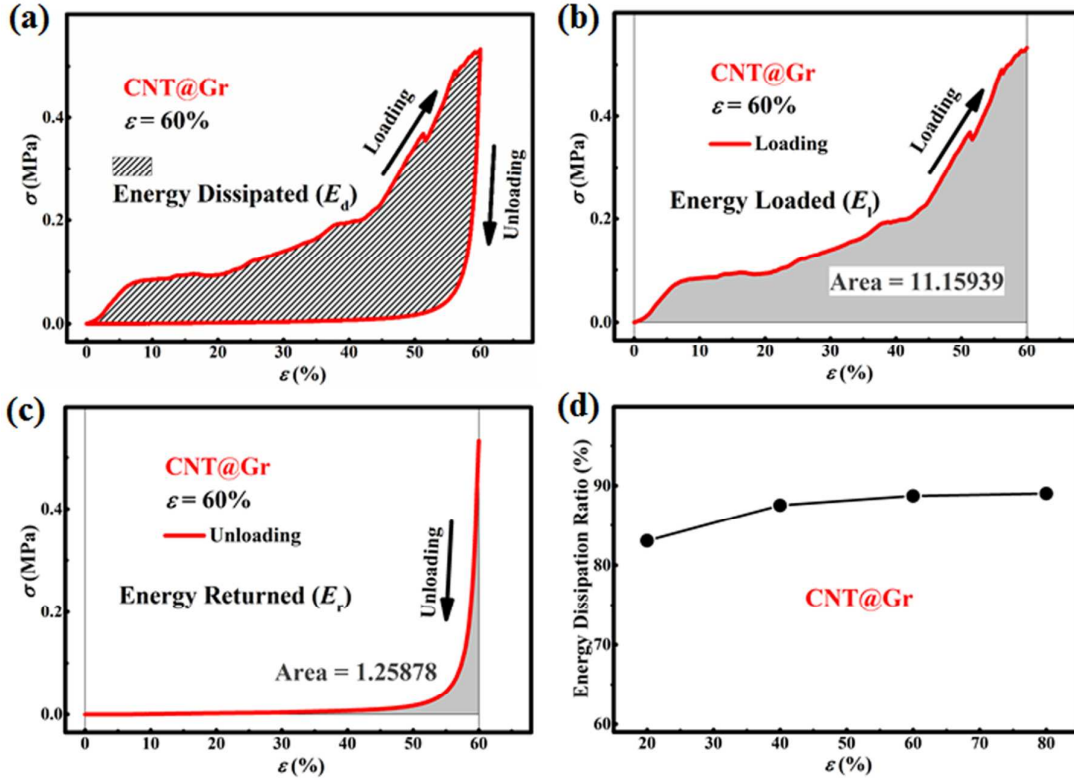

**Figure S5** Energy dissipated ( $E_d$ , shadow area in (a)), energy loaded ( $E_l$ , shadow area in (b)) and energy returned ( $E_r$ , shadow area in (c)) for the first compression cycle at  $\varepsilon = 60\%$ . (d) Energy dissipation ratios of CNT@Gr arrays at various applied  $\varepsilon$ .

**Calculation of energy dissipation ratio.** Take the first compression cycle at  $\varepsilon = 60\%$  for the CNT@Gr arrays as an example, the energy dissipation ratio ( $E_d / E_l$ ) is extracted from the corresponding stress ( $\sigma$ ) vs.  $\varepsilon$  curves,<sup>8</sup> where  $E_d$  is the energy dissipated during the loading-unloading cycle (*i.e.* the area of the hysteresis loop, Figure S4a),  $E_l$  is the energy loaded during the compression loading process (*i.e.* the area under the loading  $\sigma$  vs.  $\varepsilon$  curve, which is integrated to be 11.15939, Figure S4b). Meanwhile,  $E_d = E_l - E_r$ , where  $E_r$  is the energy returned (*i.e.* the area under the unloading  $\sigma$  vs.  $\varepsilon$  curve, which is integrated to be 1.25878, Figure S4c). As a result, the energy dissipation ratio of the CNT@Gr arrays for the first compression cycle at  $\varepsilon = 60\%$  could be calculated to be  $E_d / E_l = (E_l - E_r) / E_l = (11.15939 - 1.25878) / 11.15939 \approx 88.72\%$ .

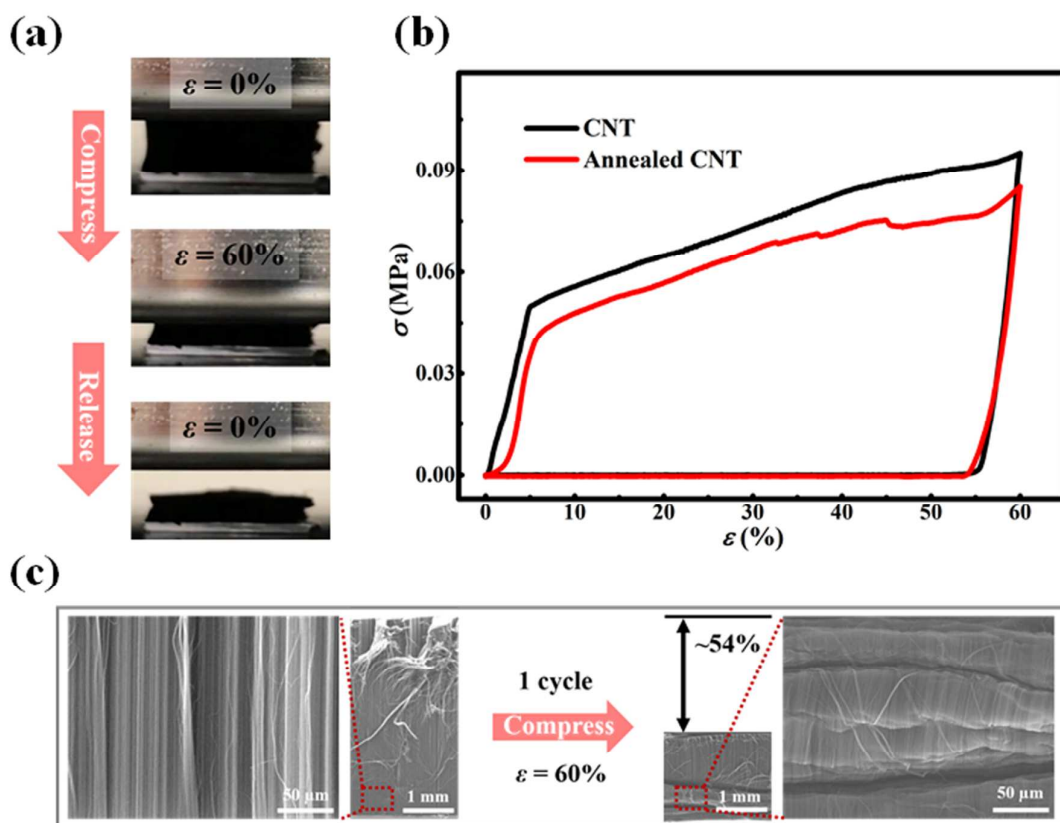

**Figure S6** Compressive mechanical responses of annealed CNT arrays. (a) Annealed CNT arrays deform almost plastically upon uniaxial compression at  $\varepsilon = 60\%$ . (b) Compressive stress  $\sigma$  vs.  $\varepsilon$  curves at  $\varepsilon = 60\%$  of CNT arrays before and after high temperature annealing. (c) Cross-sectional SEM images of the annealed CNT arrays before and after 1 cycle of compression at  $\varepsilon = 60\%$ .

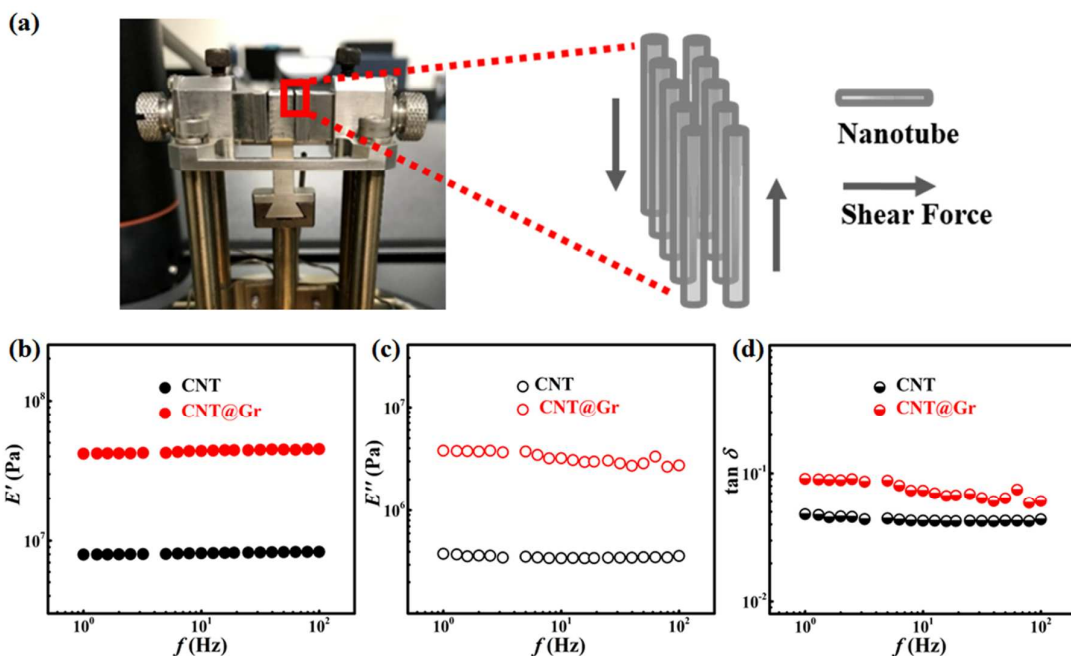

**Figure S7** Dynamic shear tests of CNT and CNT@Gr arrays. (a) Shear sandwich clamp was used to measure the longitudinal shear viscoelastic properties of the NT arrays. (b) Storage modulus ( $E'$ ), (c) loss modulus ( $E''$ ) and (d) damping ratio ( $\tan \delta$ ) of the CNT and CNT@Gr arrays as functions of applied frequency ( $f$ ) (1–100 Hz, at  $\varepsilon = 2\%$ ).

**Dynamic shear tests.** Upon the applied shear loading of  $\varepsilon = 2\%$  over the broad  $f$  range, the CNT@Gr arrays perform generally stable  $E'$  and  $E''$  of  $\sim 41.7$  and  $\sim 3.8$  MPa, respectively, which are  $\sim 5$ – and  $\sim 10$ –fold higher than those of their CNT counterpart ( $\sim 8.0$  and  $\sim 0.38$  MPa, respectively). As a result, the CNT@Gr arrays shows  $\sim 2$ –fold increase in the  $\tan \delta$  ( $\sim 0.1$ ) as compared to the CNT arrays ( $\sim 0.045$ ). These substantial enhancements in the longitudinal shear viscoelastic properties of the CNT@Gr arrays indicate their reinforced inter-tube interactions because of the enlarged tube diameter and strengthened tube-tube contacts as compared to CNT arrays, which contribute to their enhanced compressive strength and viscoelasticity.

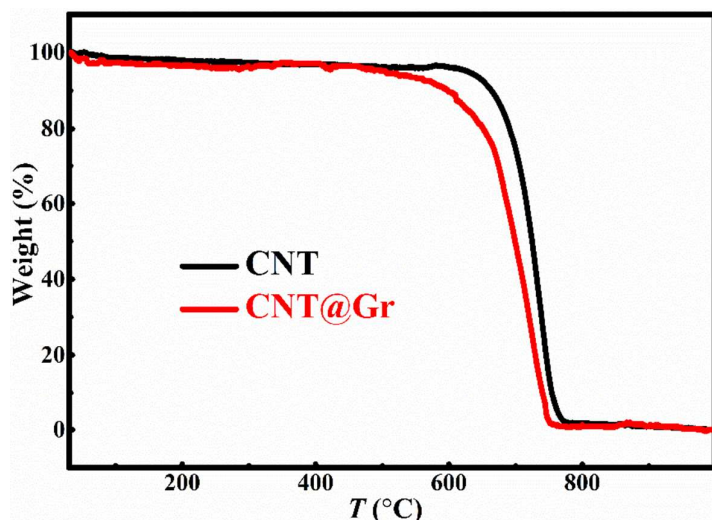

**Figure S8** TGA analysis of CNT and CNT@Gr under a constant air flow of 50 mL min<sup>-1</sup>. With the encapsulation of oxidation resistant graphene layers, the CNT@Gr generally retains the thermal stability of CNT in ambient air.

## References

1. Fitzer, E.; Frohs, W.; Heine, M. Optimization of Stabilization and Carbonization Treatment of Pan Fibres and Structural Characterization of the Resulting Carbon Fibres. *Carbon* **1986**, 24, 387–395.
2. Kim, K. H.; Oh, Y.; Islam, M. Graphene Coating Makes Carbon Nanotube Aerogels Superelastic and Resistant to Fatigue. *Nat. Nanotechnol.* **2012**, 7, 562–566.
3. Brydson, R.; Zhili, Z.; Brown, A. In *Revisiting the Determination of Carbon  $sp^2/sp^3$  Ratios via Analysis of the EELS Carbon K-Edge*, EMC 2008 14th European Microscopy Congress, Aachen, Germany, Sept 1–5, 2008; Luysberg, M., Tillmann, K., Weirich, T., Eds.; Springer, Berlin, Heidelberg, 2008.
4. Galvan, D.; Pei, Y.; De Hosson, J. T. M.; Cavaleiro, A. Determination of the  $sp^3$  C Content of a-C Films Through EELS Analysis in the TEM. *Surf. Coat. Technol.* **2005**, 200, 739–743.
5. Zhang, S.; Zeng, X.; Xie, H.; Hing, P. A Phenomenological Approach for the  $I_d/I_g$  Ratio and  $sp^3$  Fraction of Magnetron Sputtered a-C Films. *Surf. Coat. Technol.* **2000**, 123, 256–260.

6. You, B.; Wang, L.; Yao, L.; Yang, J. Three Dimensional N-Doped Graphene-CNT Networks for Supercapacitor. *Chem. Commun.* **2013**, *49*, 5016–5018.
7. Díaz, J.; Paolicelli, G.; Ferrer, S.; Comin, F. Separation of the sp<sup>3</sup> and sp<sup>2</sup> Components in the C1s Photoemission Spectra of Amorphous Carbon Films. *Phys. Rev. B* **1996**, *54*, 8064.
8. Bennett, M.; Ker, R. The Mechanical Properties of the Human Subcalcaneal Fat Pad in Compression. *J. Anat.* **1990**, *171*, 131.
